# Supplementary material
Source: PubMed Central journal article supplement (PMC196575)

## **Supplementary Data**

**Figure 1.** Effect of ARF3 on sorting of vacuolar ALP. Wild-type (ARF1/ARF3), *arf3* mutant, and *arf1* mutant cells were grown and radiolabeled with <sup>35</sup>S-labeled methionine and cysteine at 37°C. Immunoprecipitates were prepared as described in Materials and Methods at the indicated time points. pro-ALP is the proenzyme form, and mALP is the mature form of the enzyme in the vacuole.

**Figure 2.** Accumulation of Lucifer Yellow in vacuole in wild-type and *arf3* mutant cells.

Lucifer Yellow was used to assess fluid-phase endocytosis in wild-type and *arf3* mutant cells.

Wild type or *arl3* mutant was grown at 30°C and transferred to fresh YPD before addition of LY for 30 min or 2 h and then viewed by phase-contrast (right) and fluorescence (left) microscopy.

**Figure 3.** Endocytosis of FM 4-64 by wild-type and *arf3* mutant cells. Cells were grown at 30°C, transferred to fresh YPD at 4°C before addition of FM 4-64, and viewed by phase-contrast and fluorescence microscopy at the indicated times after return to incubation at 30°C.

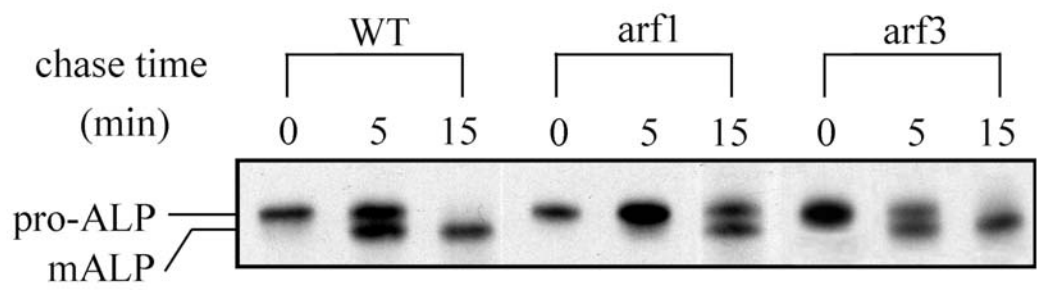

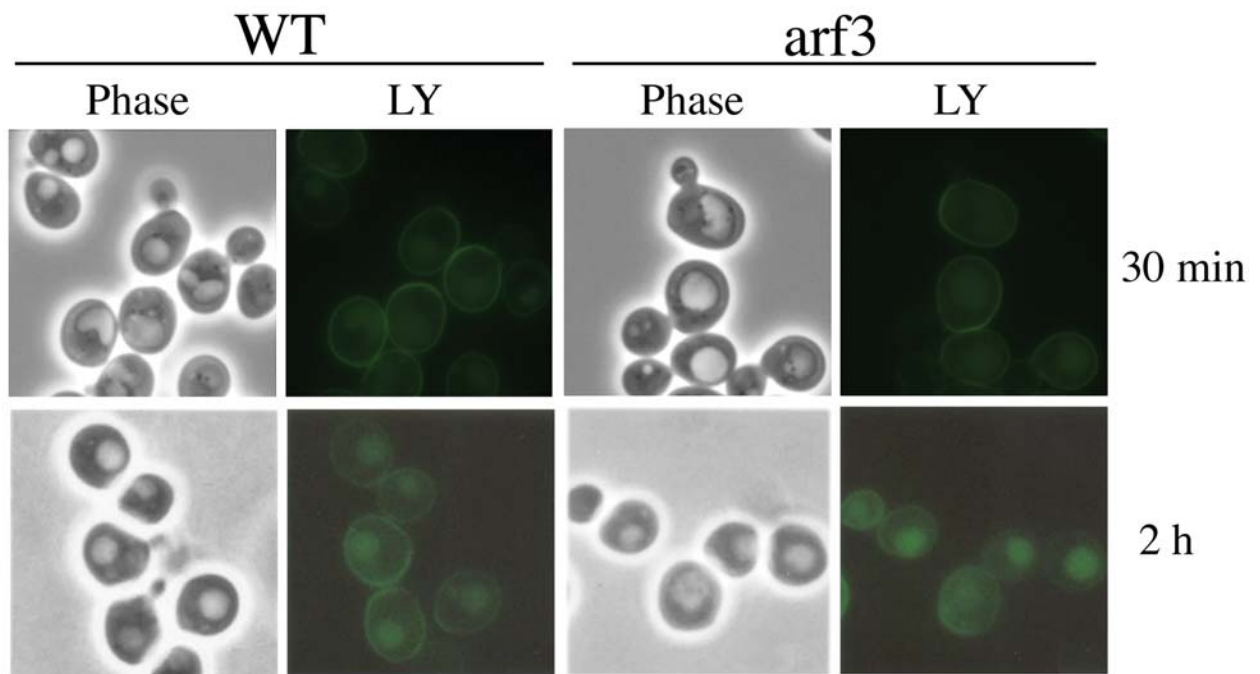

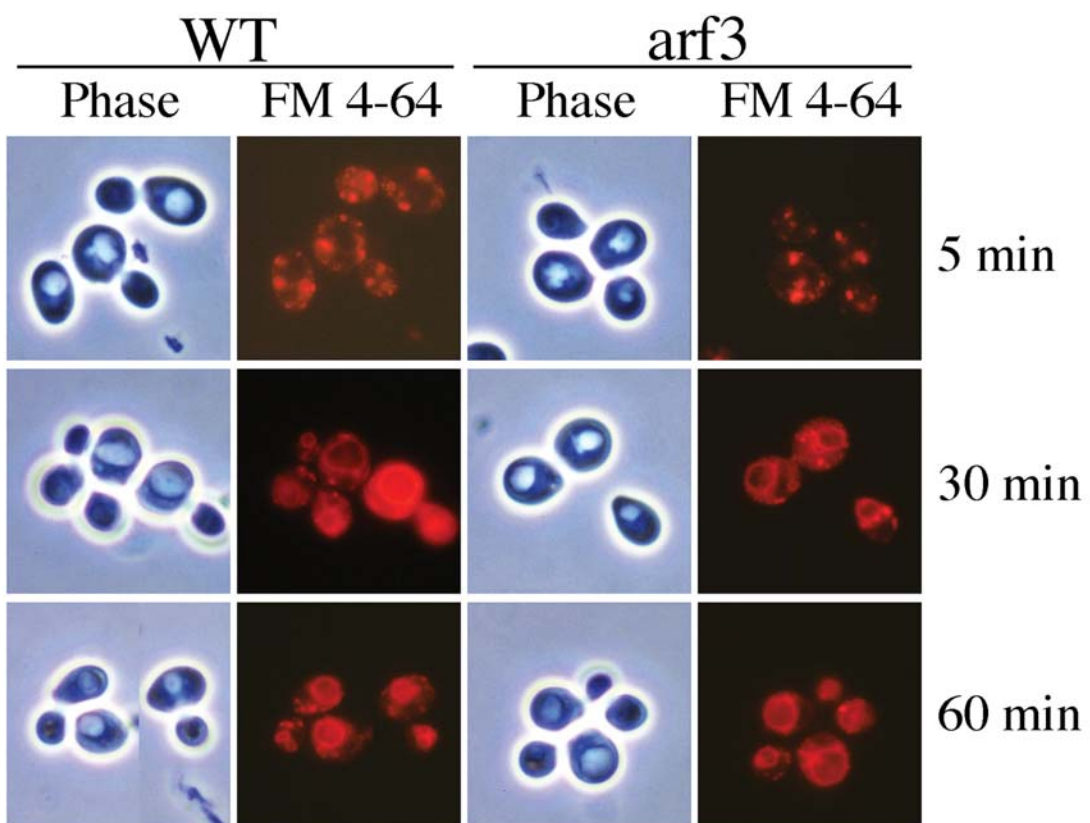

Supplement: mbc_E03-01-0013_1.pdf [file mbc_E03-01-0013_1.pdf]
