# Supplementary material
Source: PubMed Central journal article supplement (PMC196575)

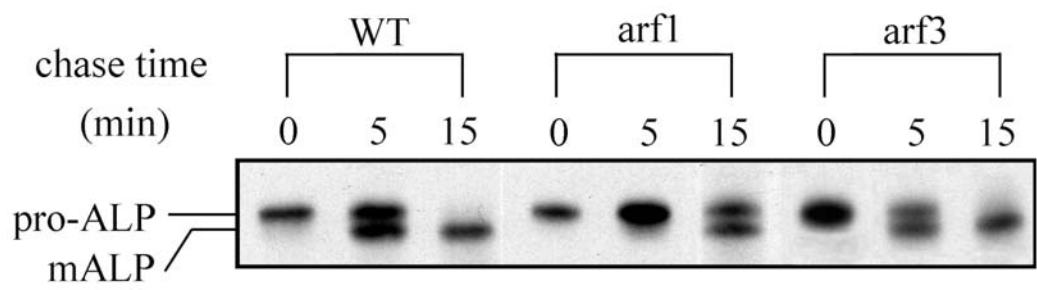

Supplement: mbc_E03-01-0013_2.pdf [file mbc_E03-01-0013_2.pdf]

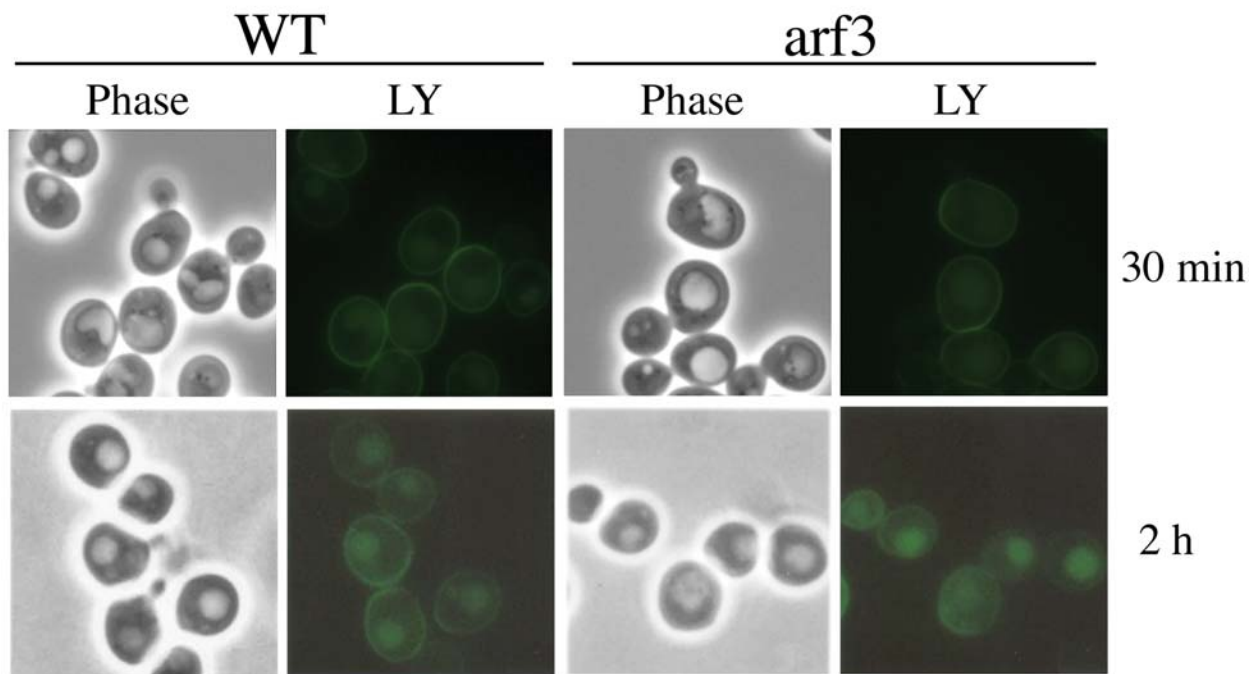

Supplement: mbc_E03-01-0013_3.pdf [file mbc_E03-01-0013_3.pdf]

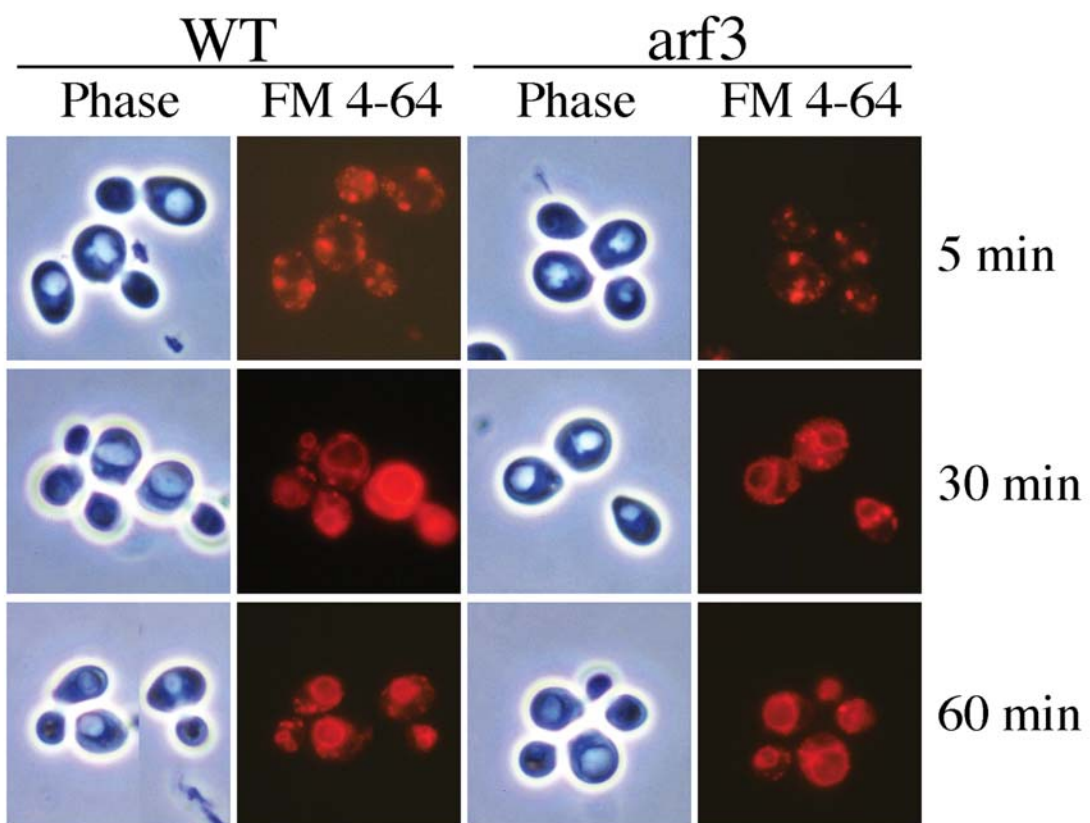

Supplement: mbc_E03-01-0013_4.pdf [file mbc_E03-01-0013_4.pdf]
